# Supplementary material
Source: PubMed Central journal article supplement (PMC8788788)
Supplement: aem.01895-21-s0001.pdf [file aem.01895-21-s0001.pdf]

## Supplementary Files

### **Diguanylate cyclase and phosphodiesterase interact to maintain the specificity of c-di-GMP signaling in the regulation of antibiotic synthesis in *Lysobacter enzymogenes***

Gaoge Xu<sup>1</sup>, Lichuan Zhou<sup>2</sup>, Guoliang Qian<sup>3</sup> and Fengquan Liu<sup>1,4,\*</sup>

1 Institute of Plant Protection, Jiangsu Academy of Agricultural Sciences, Jiangsu Key Laboratory for Food Quality and Safety-State Key Laboratory Cultivation Base, Ministry of Science and Technology, Nanjing 210014, China

2 Information Center, Jiangsu Academy of Agricultural Sciences, Nanjing 210014, China

3 College of Plant Protection, Nanjing Agricultural University, Nanjing 210095, China

4 College of Plant Protection/Key Laboratory of Green Prevention and Control of Tropical Plant Diseases and Pests, Ministry of Education, Hainan University, Haikou, 570228, China

#### **Email addresses**

Gaoge Xu: gg880712@163.com

Lichuan Zhou: zlc0813@sina.com

Guoliang Qian : glqian@njau.edu.cn

Fengquan Liu\*: fqliu20011@sina.com (\*corresponding author)

Postal address: No.50 Zhongling Street, Jiangsu Academy of Agricultural Sciences , Nanjing City, Jiangsu Province, 210014; Tel: +86-25-84396109. Fax: +86-25-84396109

Content: 1 Table and 3 Figures

**Table S1. Differentially expressed genes by RNA-Seq**

| gene_id                                    | average_<br>fpkm_<br>OH11 | average_<br>fpkm_<br>LchP | diffexp_log2fc_<br>OH11-vs-LchP | Predicted function                                                                               |
|--------------------------------------------|---------------------------|---------------------------|---------------------------------|--------------------------------------------------------------------------------------------------|
| OH11<br>3896                               | 2.783                     | 11.766                    | 2.087995335                     | unknown                                                                                          |
| OH11<br>4760                               | 11.086                    | 2.743                     | -2.033020066                    | conserved hypothetical protein [ <i>Bordetella petrii</i> ]                                      |
| OH11<br>5121                               | 27.306                    | 6.723                     | -2.042801087                    | M15 family metalloproteinase [ <i>Lysobacter enzymogenes</i> ]                                   |
| <b>OH11</b><br><b>5116</b>                 | 1223.996                  | 292.356                   | -2.091782696                    | Ox3 [ <i>Lysobacter enzymogenes</i> ]                                                            |
| OH11<br>3439                               | 93.656                    | 21.58                     | -2.126074772                    | beta-lactamase [ <i>Caulobacter</i> sp. K31]                                                     |
| <b>OH11</b><br><b>5117</b>                 | 1565.753                  | 355.156                   | -2.169384035                    | Ox4 [ <i>Lysobacter enzymogenes</i> ]                                                            |
| <b>OH11</b><br><b>5115</b>                 | 1157.623                  | 256.85                    | -2.198456808                    | Ox2 [ <i>Lysobacter enzymogenes</i> ]                                                            |
| OH11<br>4008                               | 16.133                    | 3.433                     | -2.258086621                    | hypothetical protein [ <i>Dyella japonica</i> ]                                                  |
| OH11<br>4941                               | 55.29                     | 11.453                    | -2.27149193                     | glutamate--cysteine ligase [ <i>Rhodanobacter thiooxydans</i> ]                                  |
| <b>OH11</b><br><b>5114</b>                 | 1520.62                   | 300.27                    | -2.36527499                     | Ox1 [ <i>Lysobacter enzymogenes</i> ]                                                            |
| <b>OH11</b><br><b>5118</b>                 | 49.51                     | 9.113                     | -2.468662769                    | membrane transporter [ <i>Pandoraea</i> sp. SD6-2]                                               |
| <b>OH11</b><br><b>5113(pk</b><br><b>s)</b> | 1172.79                   | 202.643                   | -2.554759045                    | hybrid polyketide synthase and nonribosomal peptide synthetase [ <i>Lysobacter enzymogenes</i> ] |
| OH11<br>4940                               | 1300.68                   | 214.42                    | -2.600751899                    | hypothetical protein [ <i>Lysobacter enzymogenes</i> ]                                           |
| <b>OH11</b><br><b>5111</b>                 | 1153.756                  | 185.133                   | -2.667761099                    | ferredoxin reductase-like protein [ <i>Lysobacter enzymogenes</i> ]                              |
| <b>OH11</b><br><b>5109</b>                 | 681.983                   | 106.95                    | -2.697326158                    | arginase-like protein [ <i>Lysobacter enzymogenes</i> ]                                          |
| <b>OH11</b><br><b>5112</b>                 | 1031.64                   | 155.42                    | -2.758764386                    | sterol desaturase-like protein [ <i>Lysobacter enzymogenes</i> ]                                 |

Red tagged genes belong to HSAF biosynthesis gene cluster.

```

      1      10      20      30      40      50      60
3756 MAVLALWAVATIASAQSIVLPPVAAMSAAGAGVPARAPASEPAAARPIMSAALVA
1158 .....MERSWRLLWQTLLTLGLSA

      70      80      90      100     110     120
3756 AAPPSAAQAREAFDFIGYRAPSLSLRLAQDFVFNRVLAGEDGCRFEAVSGLVWGSK
1158 AALACAPFVVARLPG.....ADPPANQVLAGRMDARFAFVAGERIDYFD

      130     140     150     160     170     180
3756 GEPRWWRIVVNQVDPAIAPQLTIDRFSRREIELWRPGDELPRRSTYGPDIIDLNHSIRF
1158 RRTQWLRRTATADVGEDQLPOLVIDQFYRKFEDIWRHRDADPVRRALHGRGSEFQHSRF

      190     200     210     220     230     240
3756 IVEPTPKGLRKGDAIYLRMLAAIVLSQVEVEPLAKVQRDMMHVG LRSVVLTAMGVAV
1158 VVYPTPEGGLRKGVIYLRITYATEFTPSTLRHEPLAVHRQDMGHVALRSVVLTAGATAI

      250     260     270     280     290     300
3756 LAFGFWIGLRERGYAYLCLTLLIQILTLTSDGGEMRVVVPWIKDIAPDTRTNIVLTAATL
1158 LAFGFWVGLRERGYAYLCLTLLVQTVNLAIVEGGEIRMIPWIEVIEPNRRTNVVLTAAATL

      310     320     330     340     350     360
3756 ASIRFLIFELGLRRTQPRVTRADWCSYSLGALIVVSLFRTWKYSALYGNLNLVLAALI
1158 ASVRFIMFELDLRRTQAGVAKVINACSNVVGALLAVSLVQTWKLSASEGNLVLLVLIQAV

      370     380     390     400     410     420
3756 LYATVVAVWRRQREAYFLLAWVPLMVLLVVLVGANHEWWEFAWLEYTFVGLVFGGLG
1158 FYACAVAISSRQREAYFLAGAWVPLLAVLVVLVGFQKWWMF FAWLEYAVPLGLVFGGLG

      430     440     450     460     470     480
3756 LLLGLTSKIQQLRRDRDTANRLATYDSLTCAMTRATSQSLRSAVESAHRSQRPLSVVFF
1158 LLLGLAAKIQKLRQDHDATKHRATYDRLTSMNRQATEQSLREALEAHRSRRLIVVFF

      490     500     510     520     530     540
3756 DIDHFKRINDEHGRVGDERTLRIVALLRTRNRLRAYDLFGRYGGDEVLVVIADTYLIRDAAR
1158 DIDHFKRINDEHGRVAGDEALRTVAERTRNRLRATDLGCRYGGDEILVGIHPGTRLEQGLV

      550     560     570     580     590     600
3756 VAEHLRESVSGSPISIDGRLLPVSLSGVAELQPGETPEQLLERADAALYASKSAGRDRV
1158 VAEHLRAVAGANPFSVHGRALNLSLSGVAELRPGENFDQLLERADAALYASKSAGRDRV

      610
3756 TAHGSESHEVVS
1158 TVQRAAVEVAI.

```

Figure S1. Multiple sequence alignment shows that 3756 and 1158 share 55% similarity of the amino acid sequence.

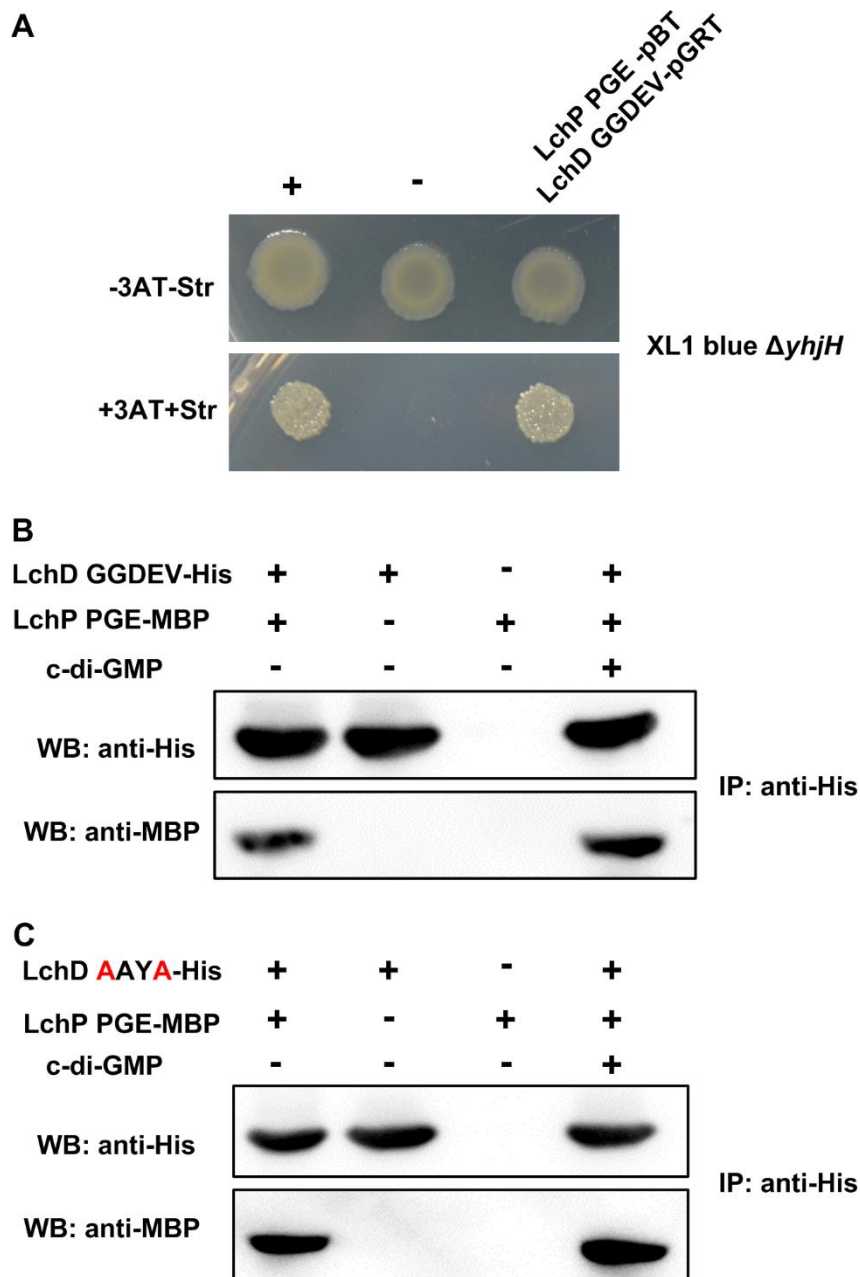

**Figure S2.** (A) B2H assay indicates LchP and LchD interact in the high c-di-GMP background strains. +, positive control (GacS-pBT and GacS-pTRG); -, negative control (vectors pBT and pTRG). (B) & (C) Protein pull-down assay.

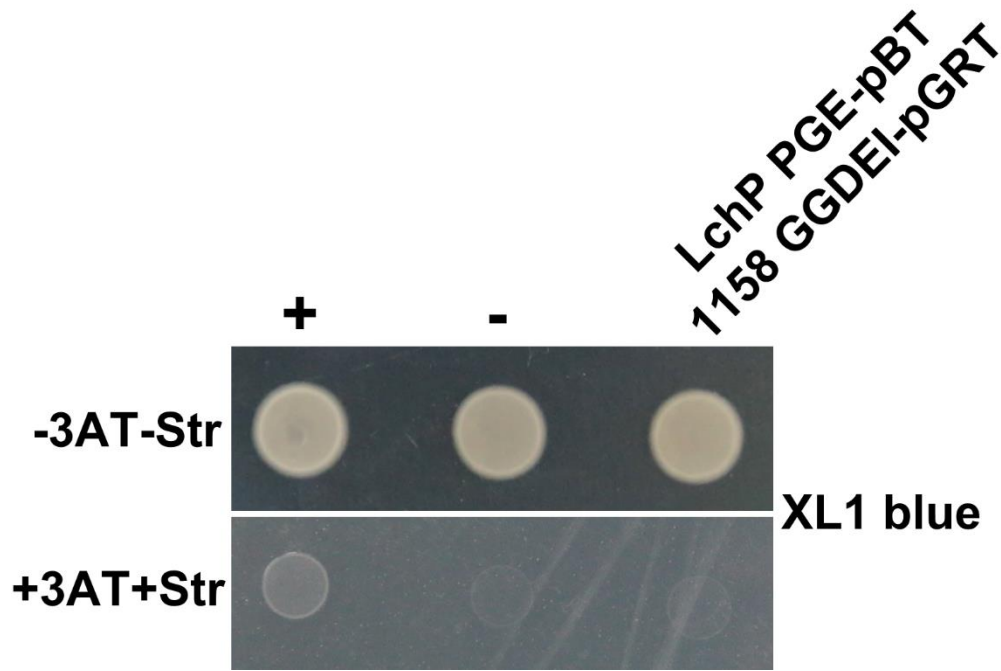

**Figure S3.** B2H assay indicates LchP does not interact with 1158. +, positive control (GacS-pBT and GacS-pTRG); -, negative control (vectors pBT and pTRG).
